# Supplementary material for: The anti-carcinogenesis properties of erianin in the modulation of oxidative stress-mediated apoptosis and immune response in liver cancer
Source: publisher site journal article supplement (doi:10.18632/aging.102456), 2019-11-20
Supplement: Supplementary file [file aging-v11i22-102456-supplementary-material-SD1.pdf]

## SUPPLEMENTARY FIGURE

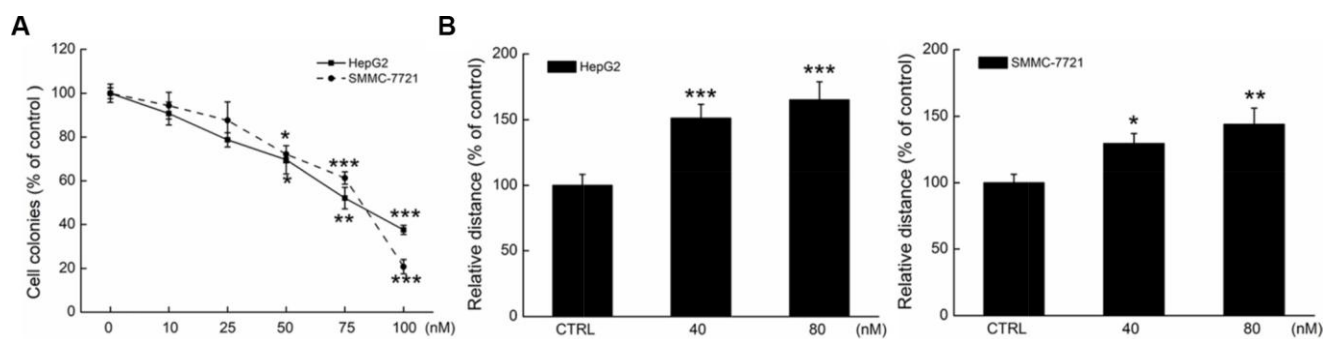

**Supplementary Figure 1.** (A) Erianin suppressed the formation of HepG2 and SMMC-7721 cell colonies. (B) Erianin inhibited the migration ability of HepG2 and SMMC-7721 cells after 24-h incubation analyzing via a wound healing assay. The distances of migrating cells were quantified using software Image J. Data are expressed as percentages relative to the corresponding control cells and as mean  $\pm$  SD ( $n = 6$ ). \* $P < 0.05$ , \*\* $P < 0.01$ , and \*\*\* $P < 0.001$  vs control cells.
