# Supplementary material for: The anti-carcinogenesis properties of erianin in the modulation of oxidative stress-mediated apoptosis and immune response in liver cancer
Source: publisher site journal article supplement (doi:10.18632/aging.102456), 2019-11-20
Supplement: Supplementary file [file aging-v11i22-102456-supplementary-material-SD3.pdf]

## SUPPLEMENTARY TABLES

Please browse Full Text version to see the data of Supplementary Table 1

**Supplementary Table 1. The results of the Proteome Profiler™ Array using the Mouse XL Cytokine Kit.**

**Supplementary Table 2. The primer sequences used in RT-PCR.**

| Fragment size (bp) | Name      | Sequence (5' to 3')   |
|--------------------|-----------|-----------------------|
| 342                | HO-1-F    | GCCCTGGAAGAGGAGATAGA  |
|                    | HO-1-R    | GTCGATGTTCCGGAAGGTAAA |
| 288                | SOD-1-F   | CGGATGAAGAGAGGCATGTT  |
|                    | SOD-1-R   | GGTTTGAGGGTAGCAGATGAG |
| 137                | β-actin-F | ATCGTGCGAGACATCAATG   |
|                    | β-actin-R | TCGTTGCCTATTGTGATGAC  |
